# Supplementary material
Source: PubMed Central journal article supplement (PMC6596310)
Supplement: NIHMS1035412-supplement-Supplemental_Information.pdf [file NIHMS1035412-supplement-Supplemental_Information.pdf]

## Supporting Information

Submitted to *Analytical Chemistry*

### **A Boosting to Amplify Signal with Isobaric Labeling (BASIL) Strategy for Comprehensive Quantitative Phosphoproteomic Characterization of Small Populations of Cells**

Lian Yi<sup>1‡</sup>, Chia-Feng Tsai<sup>1‡</sup>, Ercument Dirice<sup>3</sup>, Adam C. Swensen<sup>1</sup>, Jing Chen<sup>4</sup>, Tujin Shi<sup>1</sup>, Marina A. Gritsenko<sup>1</sup>, Rosalie K. Chu<sup>2</sup>, Paul D. Pichowski<sup>1</sup>, Richard D. Smith<sup>1,2</sup>, Karin D. Rodland<sup>1</sup>, Mark A. Atkinson<sup>4</sup>, Clayton E. Mathews<sup>4</sup>, Rohit N. Kulkarni<sup>3</sup>, Tao Liu<sup>1,#</sup>, and Wei-Jun Qian<sup>1,#</sup>

<sup>1</sup>Biological Sciences Division and <sup>2</sup>Environmental Molecular Sciences Laboratory, Pacific Northwest National Laboratory, Richland, WA

<sup>3</sup>Section of Islet Cell Biology and Regenerative Medicine, Joslin Diabetes Center and Harvard Medical School, Boston, MA.

<sup>4</sup>Department of Pathology, Immunology, and Laboratory Medicine, University of Florida, Gainesville, FL;

**Running title:** Signal boosting strategy for sensitive phosphoproteomics

**Keywords:** phosphorylation, phosphoproteomics, pancreatic islets, small populations of cells.

‡C.-F.T. and L.Y. contributed equally to this manuscript

#Authors for correspondence:

Dr. Wei-Jun Qian  
Email: [weijun.qian@pnnl.gov](mailto:weijun.qian@pnnl.gov)

Dr. Tao Liu  
Email: [tao.liu@pnnl.gov](mailto:tao.liu@pnnl.gov)

**SI Methods:**

**Cell culture and treatment**-----Page S3

**Peptide Fractionation by Basic Reversed-phase Liquid Chromatography (bRPLC)**- Page S5

**IMAC enrichment**-----Page S5

**LC-MS/MS analysis**-----Page S6

**Figure S1.** Correlation of the TMT reporter ion intensities (log<sub>2</sub> scale) between channel 126, 127N and 127C, each with 10 µg of tryptic peptides from the MCF-7 cells. -----Page S7

**Figure S2.** Summary of quantitative phosphoproteome analysis of 3 AML cell lines (MOLM14, K562 and CMK) with and without adding boosting samples. (a) The TMT-10 channel assignment. Reference and boosting samples: the mix of all three cell line samples. (b) The summary of identified phosphopeptides and phosphorylation sites. -----Page S8

**Figure S3.** The percentage of missing value of quantifiable PSMs with and without using the boosting sample. -----Page S9

**Figure S4.** Summary of quantitative phosphoproteome analysis of 3 AML cell lines (MOLM14, K562 and CMK). Left, the Pearson correlation of the study samples. Right, the PCA result of the quantitative phosphoproteomic analysis of the AML cell lines. -----Page S10

**Figure S5.** The quantitation correlation between standard sample preparation and boosting (BASIL) approaches. (a) Unsupervised clustering of significantly changing phosphorylation sites. (b) Fold change for peptides found in both standard and “boost” approaches to be differentially expressed using a T-test followed by Benjamini-Hochberg correction.----- Page S11

**Figure S6.** Distribution of abundance of phosphorylation sites of HLA family in human islets samples before and after cytokine treatment. -----Page S12

## **SI Methods:**

### **Cell culture and treatment**

Breast cancer cell line MCF-7 was obtained from the American Type Culture Collection and were grown as previously described<sup>20</sup>. Briefly, MCF-7 cells were maintained in 15-cm dishes in Dulbecco's Modified Eagle Medium (Thermo Fisher Scientific) supplemented with 10% heat-inactivated fetal bovine serum (Thermo Fisher Scientific), 100 U/mL penicillin, and 100 µg/mL streptomycin (Thermo Fisher Scientific). Cells were seeded into 15-cm culture plates and grown until near confluence at 37 °C with 5% CO<sub>2</sub>. MCF-7 cells were rinsed twice with ice cold PBS and harvested in 1 mL ice-cold PBS containing 1% phosphatase inhibitor (Thermo Fisher Scientific).

For the AML cells, MOLM-14 and K562 cells were maintained in RPMI-1640 medium supplemented with 10% fetal bovine serum (FBS); CMK cells were maintained in RPMI-1640 medium supplemented with 20% FBS. Culture media were also supplemented with 2 mM L-glutamine, 100 U/mL penicillin, and 100 µg/mL streptomycin. All cell lines were cultured at 37 °C in 5% CO<sub>2</sub>. Cell lines used in this study were not cultured for longer than 6 months from initial purchase or characterization. Indicated number of cells were washed with PBS, pelleted, and stored at -80 °C for phosphoprotein analyses.

Human islets from eight non-diabetic cadaveric donors were obtained from the Integrative Islet Distribution Program (IIDP). Donor islets were required to have a minimum of 85% purity and 90% viability. ~150 Islets per condition were cultured in 2 mL Standard Islet Medium (Prodo) supplemented with human AB serum (Prodo), Ciprofloxacin (Fisher), and glutamine and glutathione (Prodo) at 37 °C, under 100% humidity and 5% CO<sub>2</sub>. Islet cultures were allowed to

acclimate overnight and then were either treated with cytokines IL-1 $\beta$  and IFN- $\gamma$  by adding fresh medium containing 50 U/mL and 1000 U/mL of IL-1 $\beta$  and IFN- $\gamma$ , respectively, or left untreated by adding fresh medium without cytokines for 24 h. Islets were then collected into micro-centrifuge tubes and washed twice with PBS containing 1% phosphatase inhibitor cocktail (Thermo Scientific) and 10 mM NaF (Sigma Aldrich). Islet pellets were flash frozen with liquid N<sub>2</sub> and stored at -70 °C until further analyses.

EndoC- $\beta$ H2 cells, a conditionally immortalized human  $\beta$ -cell line<sup>21</sup>, were cultured in Matrigel-fibronectin-coated (100  $\mu$ g/ml and 2  $\mu$ g/ml, respectively)<sup>22</sup> 150 mm culture dishes in Dulbecco's modified Eagle's medium, low glucose (1 g/L), containing 2% bovine serum albumin (fraction V), 10 mM nicotinamide, 5.5  $\mu$ g/mL transferrin, 6.7 ng/mL sodium selenite, 50  $\mu$ M  $\beta$ -mercaptoethanol, 100 U/mL penicillin, and 100  $\mu$ g/mL streptomycin. To create a reference sample with enhanced phosphorylation content, cells were stimulated at the same cytokine concentration for 30 min. After stimulation, cells were washed twice with ice-cold PBS containing 1% HALT phosphatase inhibitor cocktail (Thermo), 1% Protease Inhibitor and 10mM NaF (Sigma Aldrich), and immediately scaping-harvested in ice-cold PBS containing 1% HALT phosphatase inhibitor cocktail (Thermo) and 10mM NaF (Sigma Aldrich), centrifuged at 1000 rpm for 2 min. The resulting cell pellets were washed twice with PBS containing 1% phosphatase inhibitor cocktail (Thermo Scientific) and 10 mM NaF (Sigma Aldrich). Cell pellets were flash frozen with liquid N<sub>2</sub> and stored at -80 °C until further analyses.

## Peptide Fractionation by Basic Reversed-phase Liquid Chromatography (bRPLC)

The peptides were fractionated using a reversed-phase Waters XBridge C18 column (250 mm × 4.6 mm column packed with 3.5- $\mu$ m particles) on Agilent 1200 HPLC System operating at flow rate of 1 mL/min with solvent A (5 mM ammonium formate, pH 10, 2% ACN) and solvent B (5 mM ammonium formate, pH 10, 90% ACN). Peptides were separated by a gradient mixture from 0% B to 16% B in 6 min, 40% B in 60 min, 44% B in 4 min and ramped to 60% B in 5 min. The 60% B mixture was kept for 14 min. Fractions were collected from at 2 min to 95 min during the fractionation run and a total of 96 fractions was collected at equal time intervals. These 96 fractions were subsequently concatenated into 6 fractions. Each pooled fraction was dried down by vacuum centrifugation and subjected to IMAC for phosphopeptide enrichment.

## IMAC enrichment

For IMAC, peptides were reconstituted at 1  $\mu$ g/ $\mu$ L in 80% ACN/0.1%TFA prior to enrichment. The Fe<sup>3+</sup>-NTA agarose beads were prepared by replacing the Ni<sup>2+</sup> ion on the Ni-NTA beads with Fe<sup>3+</sup> through buffer exchange. Phosphopeptide enrichment was performed as previously described<sup>20</sup>. Briefly, peptide samples were incubated with 10  $\mu$ L 50% bead slurry at room temperature for 30 min with shaking and the supernatant was discarded. The beads were resuspended in 100  $\mu$ L 80%ACN/0.1%TFA and loaded on Empore C18 silica-packed Stage Tips for washing and desalting. Before sample loading, the Stage Tips were washed with 100  $\mu$ L methanol twice, 50  $\mu$ L 50% ACN/0.1% FA once, and 100  $\mu$ L 1% FA twice. After washing the beads with 50  $\mu$ L 80%ACN/0.1%TFA twice and 50  $\mu$ L 1% FA once, the phosphopeptides were eluted from the IMAC beads to the C18 membrane with 70  $\mu$ L 500 mM phosphate buffer, pH 7.0 three times and washed with 100  $\mu$ L 1%FA once before being eluted from the C18 membrane with

60  $\mu$ L 50%ACN/0.1%FA. Eluted phosphopeptides were dried down and stored at -80°C until LC-MS/MS analysis.

### **LC-MS/MS analysis**

Lyophilized phosphopeptides were reconstituted in 12  $\mu$ L 0.1%FA with 2% ACN and a 5  $\mu$ L sample was injected directly into a nanoACQUITY UPLC system (Waters Corp., Milford, MA). Peptides were separated on an in-house packed analytical column (75  $\mu$ m i.d.  $\times$  20 cm) containing 1.9- $\mu$ m ReproSil C18 resin with a column heater set at 50 °C. The mobile phases consisted of (A) 0.1% FA with 3%ACN and (B) 0.1% FA in 90% ACN. The gradient setting for peptides separation was : 2-6% solvent B in 1 min, 6-30% solvent B in 84 min, 30-60% solvent B in 9 min, 60-90% solvent B in 1 min, and finally 90% solvent B for 5 min. The flow rate was controlled at 200 nL/min. The LC system was coupled online with an Orbitrap Fusion Lumos Tribrid mass spectrometer (Thermo Scientific, San Jose, CA). Data were acquired in a data-dependent mode with a full MS scan from m/z 350-1800 at a resolution of 60,000 at m/z 400 with AGC setting set to  $4 \times 10^5$  and maximum ion injection period set to 50 ms. The MS/MS isolation window was set at 0.7 m/z and HCD fragmentation was performed at a normalized collision energy of 30% with AGC set as  $1 \times 10^5$  and a maximum ion injection time of 300 ms. The MS/MS spectra was acquired at a resolution of 50,000. The cycle time was 2 seconds and dynamic exclusion time was set at 45 s.

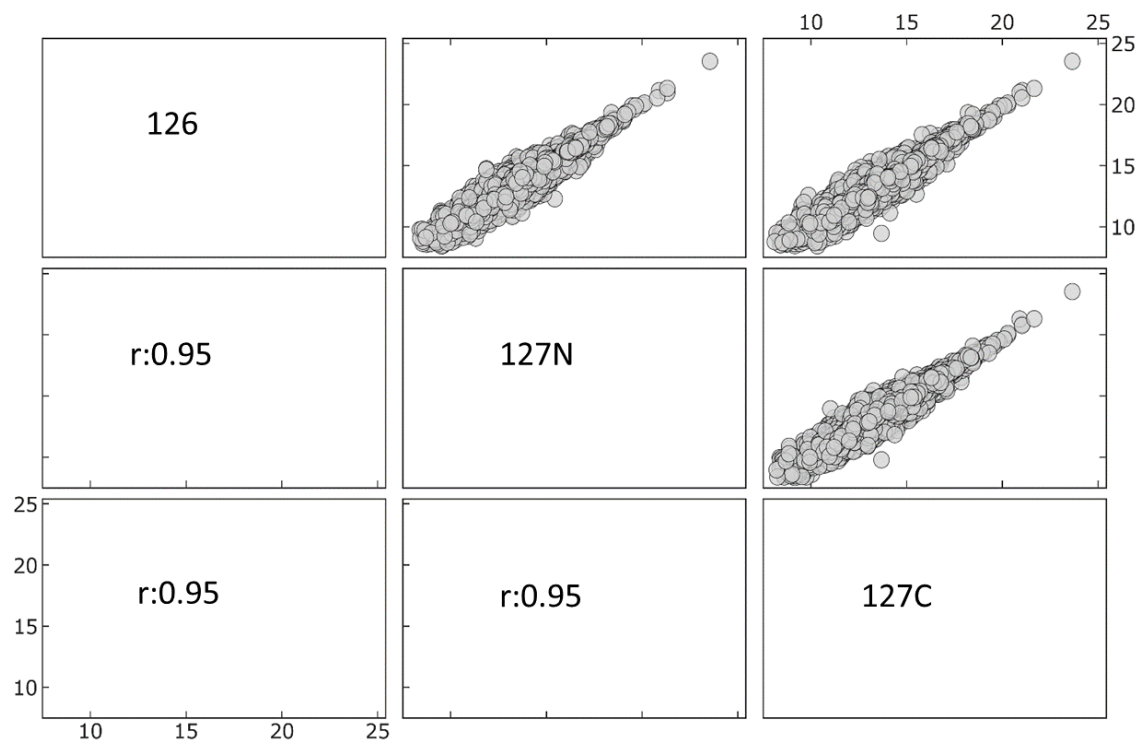

**Figure S1.** Correlation of the TMT reporter ion intensities (log<sub>2</sub> scale) between channel 126, 127N and 127C, each with 10 μg of tryptic peptides from the MCF-7 cells.

(a)

| Channel | Without boosting |                                | With boosting |                                |
|---------|------------------|--------------------------------|---------------|--------------------------------|
|         | Samples          | input amount ( $\mu\text{g}$ ) | Samples       | input amount ( $\mu\text{g}$ ) |
| 126     | MOLM14           | 10                             | MOLM14        | 10                             |
| 127N    | K562             | 10                             | K562          | 10                             |
| 127C    | MOLM14           | 10                             | MOLM14        | 10                             |
| 128N    | K562             | 10                             | K562          | 10                             |
| 128C    | CMK              | 10                             | CMK           | 10                             |
| 129N    | MOLM14           | 10                             | MOLM14        | 10                             |
| 129C    | CMK              | 10                             | CMK           | 10                             |
| 130N    | Reference        | 10                             | Reference     | 10                             |
| 130C    | K562             | 10                             | K562          | 10                             |
| 131     | Empty            | 0                              | Boosting      | 300                            |

(b)

| LC-MS/MS                        | Without boosting |       | With boosting |
|---------------------------------|------------------|-------|---------------|
|                                 | 1D-LC            | 1D-LC | 2D-LC         |
| Phosphopeptides                 | 3991             | 7480  | 23006         |
| Phosphorylation sites           | 3673             | 6795  | 18868         |
| Phosphorylation sites (Class 1) | 2833             | 5424  | 15083         |
| S                               | 2569             | 4941  | 13468         |
| T                               | 250              | 464   | 1531          |
| Y                               | 14               | 19    | 84            |

**Figure S2.** Summary of quantitative phosphoproteome analysis of 3 AML cell lines (MOLM14, K562 and CMK) with and without adding boosting simples. (a) The TMT-10 channel assignment. Reference and boosting samples: the mix of all three cell line samples. (b) The summary of identified phosphopeptides and phosphorylation sites.



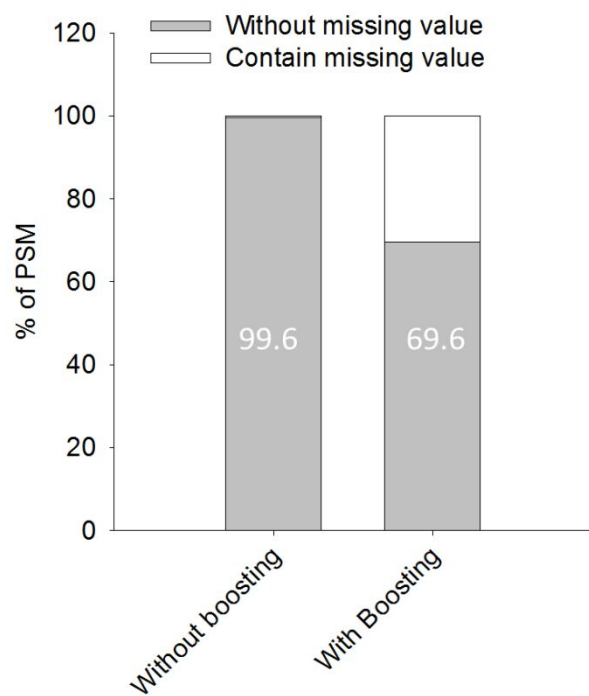

**Figure S3.** The percentage of missing value of quantifiable PSMs with and without using the boosting sample.

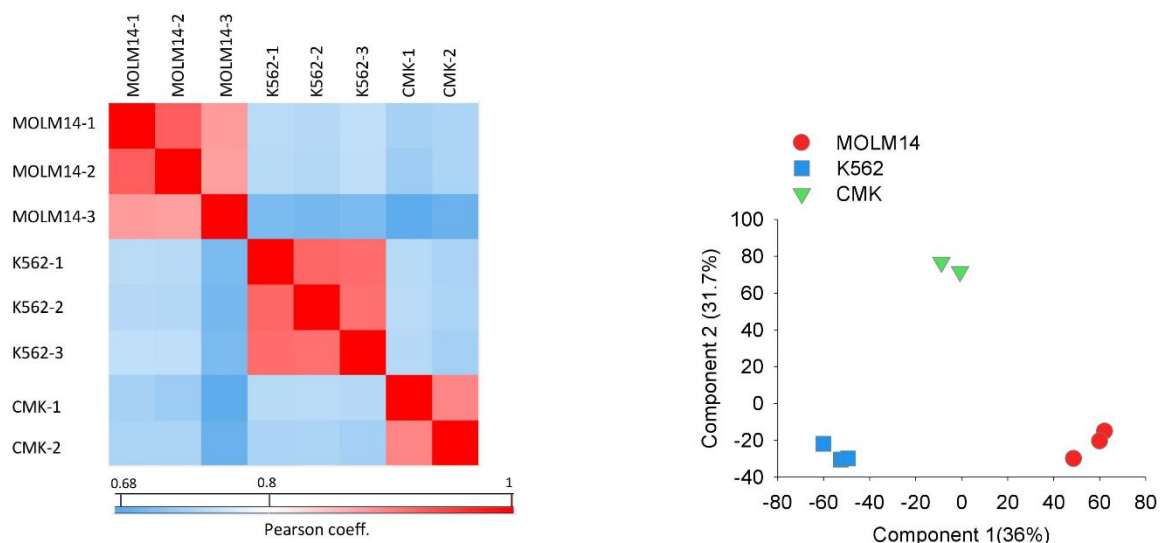

**Figure S4.** Summary of quantitative phosphoproteome analysis of 3 AML cell lines (MOLM14, K562 and CMK). Left, the Pearson correlation of the study samples. Right, the PCA result of the quantitative phosphoproteomic analysis of the AML cell lines.

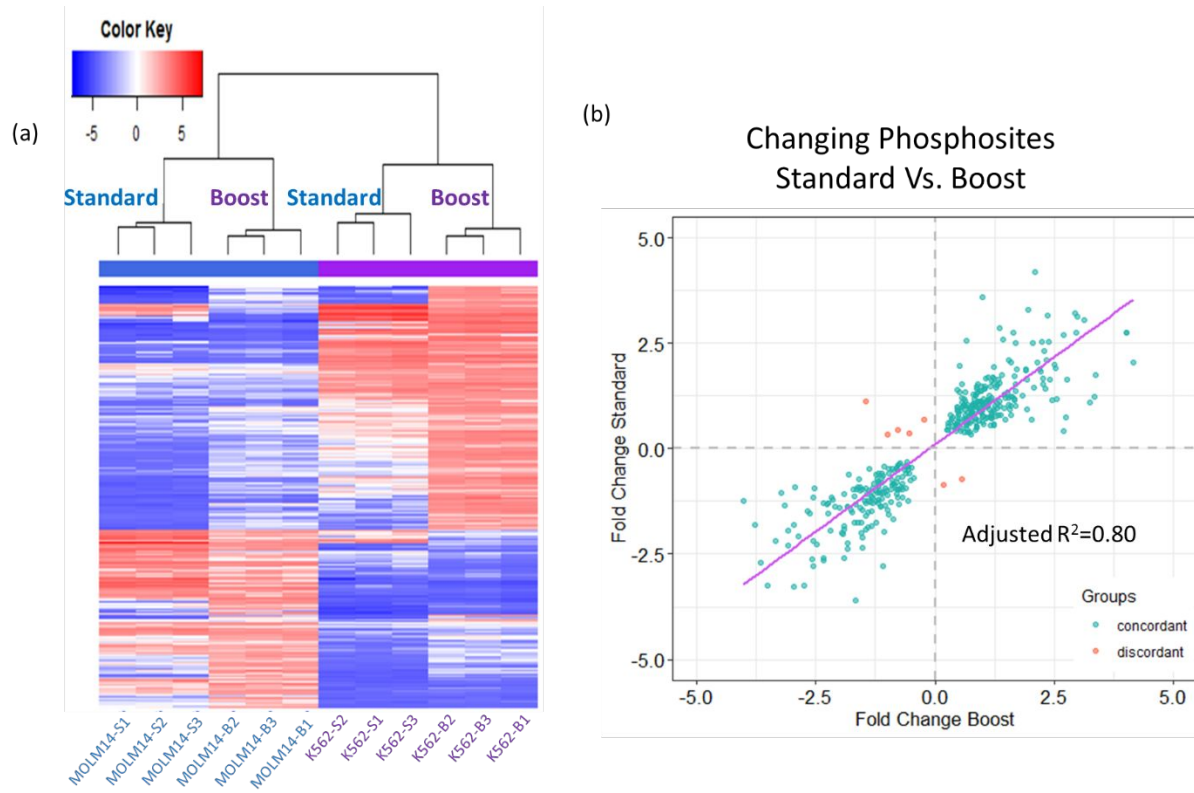

**Figure S5.** The correlation of quantification results between the standard TMT-based phosphoproteomics workflow and the boosting (BASIL) approach. (a) Unsupervised clustering of significantly changing phosphorylation sites from both approaches. (b) Correlation of fold changes for differentially expressed phosphosites from both the standard and “boost” approaches. A T-test with Benjamini-Hochberg correction was applied.

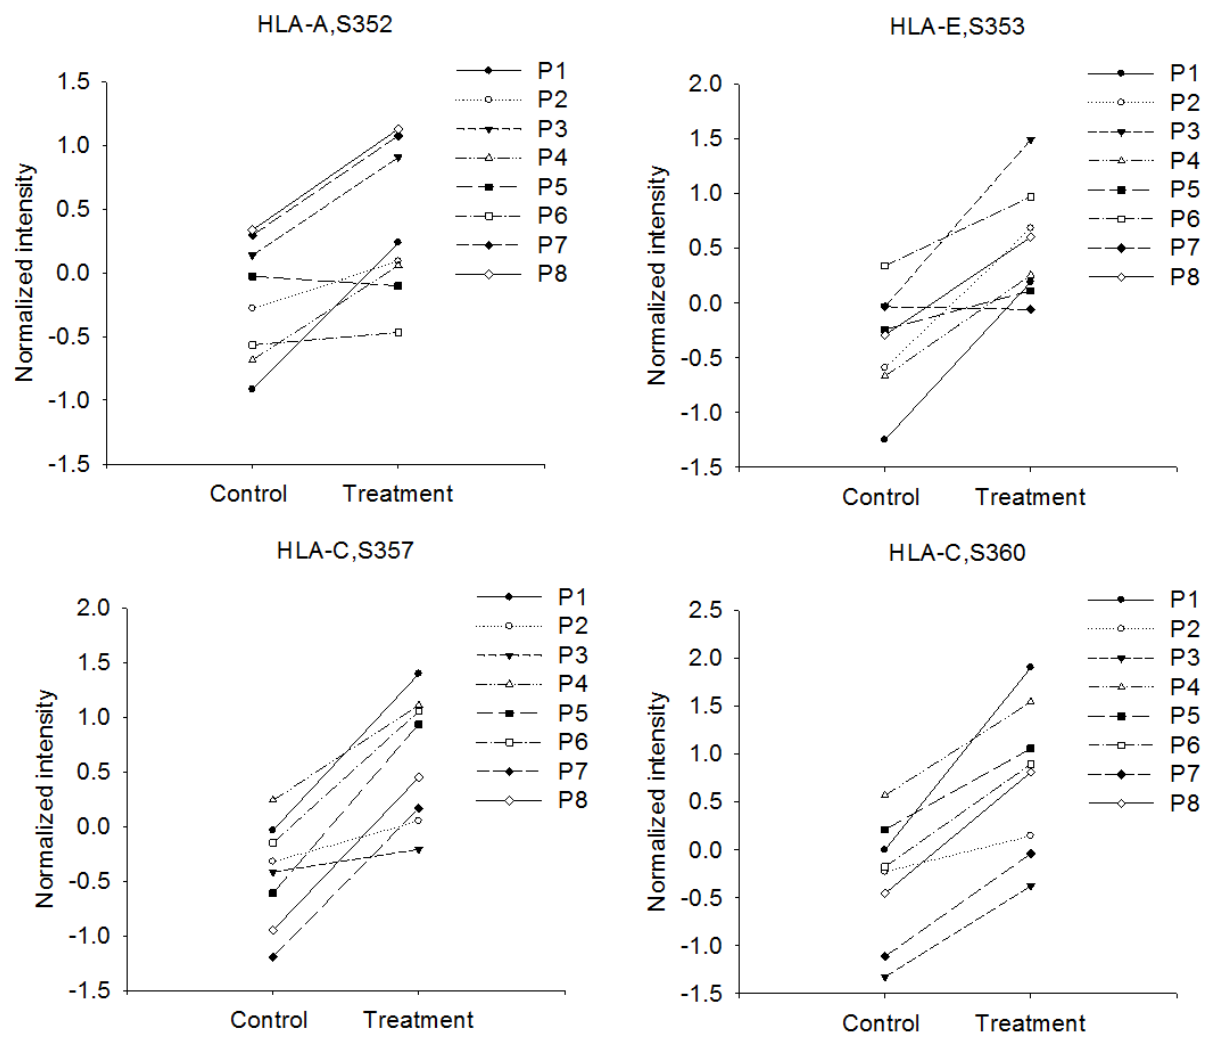

**Figure S6.** Distribution of abundance of phosphorylation sites of HLA family in human islets samples before and after cytokine treatment.
